# Supplementary material for: Comparative Genome Analysis of Lactobacillus reuteri and Lactobacillus fermentum Reveal a Genomic Island for Reuterin and Cobalamin Production
Source: PubMed Central journal article supplement — DNA Res. 2008 May 16;15(3):151–61. doi: 10.1093/dnares/dsn009 (PMC2650639; doi:10.1093/dnares/dsn009), 2008-05-16
Supplement: dsn009_1.pdf [file dsn009_1.pdf]

**Supplementary Table S1.** Gene contents of the two large unique regions in *L. reuteri* JCM 1112<sup>T</sup> compared to *L.**reuteri* DSM 20016<sup>T</sup>

| Start          | End            | Direction | Gene     | Product Name                                                 |
|----------------|----------------|-----------|----------|--------------------------------------------------------------|
| <b>442995</b>  | <b>451429</b>  |           |          | <b>Unique region I</b>                                       |
| 442840         | 444414         | -         | LAR_0380 | transposase                                                  |
| 445084         | 446091         | +         | LAR_0381 | glyceraldehyde 3-phosphate dehydrogenase                     |
| 446182         | 447387         | +         | LAR_0382 | phosphoglycerate kinase                                      |
| 447503         | 448252         | +         | LAR_0383 | triosephosphate isomerase                                    |
| 448292         | 449665         | +         | LAR_0384 | enolase                                                      |
| 449836         | 451446         | +         | LAR_0385 | transposase                                                  |
| <b>1064161</b> | <b>1094397</b> |           |          | <b>Unique region II</b>                                      |
| 1065608        | 1066297        | -         | LAR_0936 | nitrate reductase gamma subunit                              |
| 1066290        | 1066868        | -         | LAR_0937 | nitrate reductase delta subunit                              |
| 1066861        | 1068420        | -         | LAR_0938 | nitrate reductase beta subunit                               |
| 1068410        | 1072075        | -         | LAR_0939 | nitrate reductase alpha subunit                              |
| 1072221        | 1073240        | +         | LAR_0940 | molybdopterin biosynthesis protein MoeB                      |
| 1073237        | 1073734        | +         | LAR_0941 | molybdopterin biosynthesis protein MoaB                      |
| 1073724        | 1074941        | +         | LAR_0942 | molybdopterin biosynthesis protein MoeA                      |
| 1074920        | 1075408        | +         | LAR_0943 | molybdopterin-guanine dinucleotide biosynthesis protein MobB |
| 1075408        | 1075980        | +         | LAR_0944 | molybdopterin-guanine dinucleotide biosynthesis protein MobA |
| 1075970        | 1076254        | +         | LAR_0945 | conserved hypothetical protein                               |
| 1076405        | 1077460        | +         | LAR_0946 | two component sensor histidine kinase                        |
| 1077453        | 1078106        | +         | LAR_0947 | two component response regulator                             |
| 1078202        | 1078474        | +         | LAR_0948 | conserved hypothetical protein                               |
| 1078480        | 1079448        | +         | LAR_0949 | conserved hypothetical protein                               |
| 1079453        | 1080358        | +         | LAR_0950 | conserved hypothetical protein                               |
| 1080419        | 1081612        | -         | LAR_0951 | nitrite extrusion protein                                    |
| 1081659        | 1081904        | -         | LAR_0952 | molybdopterin biosynthesis protein MoaD                      |
| 1081904        | 1082308        | -         | LAR_0953 | molybdopterin biosynthesis protein MoaE                      |
| 1083097        | 1083873        | +         | LAR_0954 | iron(III) ABC transporter permease component                 |
| 1083870        | 1084646        | +         | LAR_0955 | iron(III) ABC transporter ATP-binding component              |
| 1084700        | 1085722        | -         | LAR_0956 | iron(III) ABC transporter substrate binding component        |
| 1088145        | 1089527        | -         | LAR_0957 | reverse transcriptase/maturase family protein                |
| 1090122        | 1093811        | -         | LAR_0958 | conserved hypothetical protein                               |

**Supplementary Table S2.** Glycerol dehydratase activity in *E. coli* containing DNA cloned from *L. reuteri* JCM 1112<sup>T</sup>

| Cell extract      | Insert DNA <sup>a</sup>   | Recipient      | Medium    | Glycerol dehydratase activity (units / wet g) <sup>b</sup> |
|-------------------|---------------------------|----------------|-----------|------------------------------------------------------------|
| Control           | No insert                 | BL21 (DE3) RIL | LB broth  | < 0.1                                                      |
| Clone 1           | <i>gupCDE</i> of JCM 1112 | BL21 (DE3) RIL | LB broth  | 4.97±1.11                                                  |
| Clone 2           | <i>gupC</i> of JCM 1112   | BL21 (DE3) RIL | LB broth  | < 0.1                                                      |
| Clone 3           | <i>gupD</i> of JCM 1112   | BL21 (DE3) RIL | LB broth  | < 0.1                                                      |
| Clone 4           | <i>gupE</i> of JCM 1112   | BL21 (DE3) RIL | LB broth  | < 0.1                                                      |
| <i>L. reuteri</i> | -                         | -              | MRS broth | 250                                                        |

a) The recombinant plasmid was constructed by cloning the fragments amplified by PCR from the JCM 1112<sup>T</sup> genomic DNA into a vector pET101/D-TOPO (Invitrogen Co.), and the insert was confirmed by DNA sequencing. The cloning step was performed in Chemically Competent *E. coli* TOP10 (Invitrogen Co.) and the expression experiments were conducted in *E. coli* BL21-CodonPlus (DE3)-RIL Competent Cells (Stratagene Co.) in the presence of isopropyl 1-thio-β-D-galactoside (IPTG). The primer sequences were as follows: forward (5'-CACCATGAAACGTCAAAAACGATTT-3'); reverse (5'-ATTAATCACCTGTTTGCCATTTCC-3').

b) The cell extracts were prepared in a total volume of 1.0 ml solution containing 0.2 M glycerol 0.05 M KCl, 0.035 M phosphor-potassium buffer (pH 8.0) and 15 μM adenosylcobalamine. The dehydratase activity was measured at 37°C for 10 min by the 3-methyl-2-benzothiazolinonehydrazone (MBTH) method<sup>S1</sup>. The activity of all clones was obtained from the same experiments performed three times. All experiments were performed using the DNA cloned in pET101 except the experiment for JCM 1112<sup>T</sup>.

**Supplementary Table S3.** Growth of *Lactobacillus delbrueckii* subsp. *lactis* ATCC 7830 in vitamin B<sub>12</sub>-free medium

| Supplements                                             | Incubation time at 37°C (O.D. 560) |       |
|---------------------------------------------------------|------------------------------------|-------|
|                                                         | 0 hr                               | 10 hr |
| Cell extract of <i>L. reuteri</i> JCM 1112 <sup>T</sup> | 0.03                               | 1.35  |
| Cell extract of <i>L. plantarum</i> WCFS1               | 0.03                               | 0.09  |
| Saline (0.75% NaCl)                                     | 0.02                               | 0.08  |
| Cyanocobalamin (0.5 µg/ml)                              | 0.02                               | 1.07  |
| Cyanocobalamin (0.7 µg/ml)                              | 0.01                               | 1.38  |
| Cyanocobalamin (0.9 µg/ml)                              | 0.01                               | 1.55  |

To detect cobalamin (vitamin B<sub>12</sub>) in the JCM 1112<sup>T</sup> cell extract, a bioassay was performed as reported previously<sup>S2</sup>. *L. delbrueckii* ATCC 7830 was inoculated in vitamin B<sub>12</sub>-free assay media (Merck Co. Ltd.) supplemented with cell extracts of JCM 1112<sup>T</sup>, *L. plantarum* WCFS1, saline solution, and cyanocobalamin solution. Each medium was incubated at 37°C for 10 hr. The culture growth was measured at the optical density at 560 nm. Quantification analyses using a cyanocobalamin standard curve indicated that JCM 1112<sup>T</sup> produced approximately 0.7 µg of cobalamin/ml. No cobalamin was found in the JCM 1112<sup>T</sup> cultural supernatant.

**Supplementary Figure S1.** Circular genome maps of *L. reuteri* JCM 1112<sup>T</sup> and *L. fermentum* IFO 3956.

The outer scale is shown in megabases. Circle 1 (from the outside in), plus strand ORFs (red); Circle 2, minus strand ORFs (blue); Circle 3, transposases (orange), group II introns (light blue); Circle 4, tRNA genes (green), rRNA genes (brown); Circle 5, GC bias [(G-C)/(G+C) khaki indicates values > 0; purple indicates values < 0]; Circle 6, GC content [outward: higher values than the average]. The position of the *pdu-cbi-cob-hem* cluster is indicated by a shaded sector in *L. reuteri* JCM 1112<sup>T</sup> (*pdu* genes, yellow; *cbi* genes, pink; *cob* genes, orange; *hem* genes, blue).

**Supplementary Figure S2.** Phylogenetic relationship between the *pdu* clusters from different sources.

The trees were based on concatenated amino acid sequence alignments of PduCDE homologues using ClustalW with a bootstrap trial of 1,000 and bootstrap values (%) are indicated at the nodes. An unrooted tree was generated using NJplot and scale bars represent the length of the branches. Genes are shown with arrows indicating the direction of transcription using the following colors; *pdu* including *gupCDE*: yellow; *cob*: orange; *pocR*: red; *eut*: green; other genes: white.

**Supplementary Figure S3.** Construction of pUC19- $\Delta$ gupCDE-ermAM for the generation of the *gupCDE* knockout mutant, LR $\Delta$ gupCDE.

A *gupCDE* knockout mutant (LR $\Delta$ gupCDE) of *L. reuteri* JCM 1112<sup>T</sup> was constructed as follows. The erythromycin and ampicillin resistant genes from pIL253<sup>S3</sup> and pUC19 were used. Fragments for splice overlap extension PCR<sup>S4</sup> were amplified using the following primers;

ermAM-forward:

5'-GAATTACAATTTACAGCGGAAAACGAAATGATACACCAATCA-3'

ermAM-reverse:

5'-CATTGATTTCGAACCTCTTTAGCTCCTTGGAAG-3'

*gupC-SalI*-forward:

5'-ATATGTCGACCCAACCTGCTTTATTACTAACA-3'

*gupC-SalI*-reverse:

5'-CATTTTCGTTTTCCGCTGTAAATTGTAATTCAAGGTG-3'

*gupE-BamHI*-forward:

5'-GCTAAAGAGGTTTCGAATCAATGAAGCCACGC-3'

*gupE-BamHI*-reverse:

3'-ATATGGATCCATTACATTCTACATAGCCCA-5'.

*L. reuteri* JCM 1112<sup>T</sup> was transformed with pUC19- $\Delta$ gupCDE-ermAM via a Gene pulser (Bio-Rad Laboratories, Inc.) at 2.5 kV, 25  $\mu$ F, and 200  $\Omega$ . Spontaneous resolution of a single crossover insertion into a double crossover resulted in LR $\Delta$ gupCDE.

**Supplementary Figure S4.** Time-dependent changes of 2D <sup>1</sup>H, <sup>13</sup>C-HSQC spectra of cultures metabolizing <sup>13</sup>C<sub>3</sub>-glycerol.

The wild-type *L. reuteri* JCM 1112<sup>T</sup> (**A**) and mutant LR $\Delta$ gupCDE (**B**) were cultured in MRS broth supplemented with 200 mM <sup>13</sup>C<sub>3</sub>-glycerol and glucose. Chemical shifts of <sup>13</sup>C-labeled metabolites produced from <sup>13</sup>C<sub>3</sub>-glycerol are assigned by a combination of 2D-<sup>13</sup>C-HSQC, 2D-<sup>13</sup>C-edited HSQC, and 2D-<sup>13</sup>C-HSQC TOCSY spectra. As shown in Supplementary Figure S5,  $\delta^1\text{H}$  (ppm) and  $\delta^{13}\text{C}$  (ppm) of 3-HPA-hydrate 1 (Hh-1), 3-HPA-hydrate 2 (Hh-2), and 3-HPA-hydrate 3 (Hh-3) were observed at 5.17 and 91.5, 2.43 and 42.6, and 3.79 and 61.6 at pH 7.0, respectively. After 7.5 hour-incubation, pH of MRS broth decline from 6.3 to 5.0 in this study. As shown in (A) at 7.5 hours,  $\delta^1\text{H}$  (ppm) and  $\delta^{13}\text{C}$  (ppm) of Hh-2 and Hh-3 were observed at 2.55 and 40.5, and 3.83 and 60.6 at pH 5.0, respectively. Although the spot derived from Hh-1 in <sup>1</sup>H chemical shift was detected in this study, the spot was not shown in (A) at 7.5 hours, because the range of <sup>1</sup>H chemical shifts shown from 4.0 to 1.5 ppm in this figure.

**Supplementary Figure S5.** Identification of 3-HPA and 3-HPA-hydrate.

(A) HSQC NMR spectrum. (B) <sup>13</sup>C-edited HSQC NMR spectrum. (C) <sup>13</sup>C-HSQC-TOCSY

NMR spectrum. A 100 mM-potassium phosphate buffer (pH = 7.0) was used for extraction of  $^{13}\text{C}_3$ -glycerol-derived metabolites both *in vitro* (Supplementary Fig. S4) and *in vivo* (Fig. 4).  $^1\text{H}$  and  $^{13}\text{C}$ -chemical shifts are referenced from the internal standard of DSS at 0 ppm. Each assignment was abbreviated: glycerol 1 (positive), G-1; glycerol 2 (negative), G-2; 3-HPA 1 (positive), H-1; 3-HPA (negative), H-2; 3-HPA (negative), H-3; 3-HPA-hydrate 1 (positive), Hh-1; 3-HPA-hydrate 2 (negative), Hh-2; 3-HPA-hydrate 3 (negative), Hh-3; 1,3-PDO 1 (negative), P-1; and 1,3-PDO 2 (negative), P-2, respectively. Contour levels of 3-HPA showed reduced signals. Purple, red, and black lines indicate H, Hh, and P correlations, respectively. Spots surrounded by red circles represent signals derived from 3-HPA-hydrate detected in (A) and (B). The spectra surrounded by squares represent the enlarged view of the 2D-NMR spectra in (A), (B), and (C).

### Supplementary References

- S1. Yamanishi, M., Yunoki, M., Tobimatsu, T., et al. 2002, The crystal structure of coenzyme B<sub>12</sub>-dependent glycerol dehydratase in complex with cobalamin and propane-1,2-diol, *Eur. J. Biochem.*, **269**, 4484-4494.
- S2. Taranto, M. P., Vera, J. L., Hugenholtz, J., de Valdez, G. F., and Sesma, F. 2003, *Lactobacillus reuteri* CRL1098 produces cobalamin, *J. Bacteriol.*, **185**, 5643-5647.
- S3. Simon, D. and Chopin, A. 1988, Construction of a vector plasmid family and its use for molecular cloning in *Streptococcus lactis*, *Biochimie*, **70**, 559-566.
- S4. Liu, Y., Wei, Y., Wu, X., and Yu, L. 2005, Preparation of ChIL-2 and IBDV VP2 fusion protein by baculovirus expression system, *Cell. Mol. Immunol.*, **2**, 231-235.

*L. reuteri* JCM 1112<sup>T</sup>

2,039,414 bp

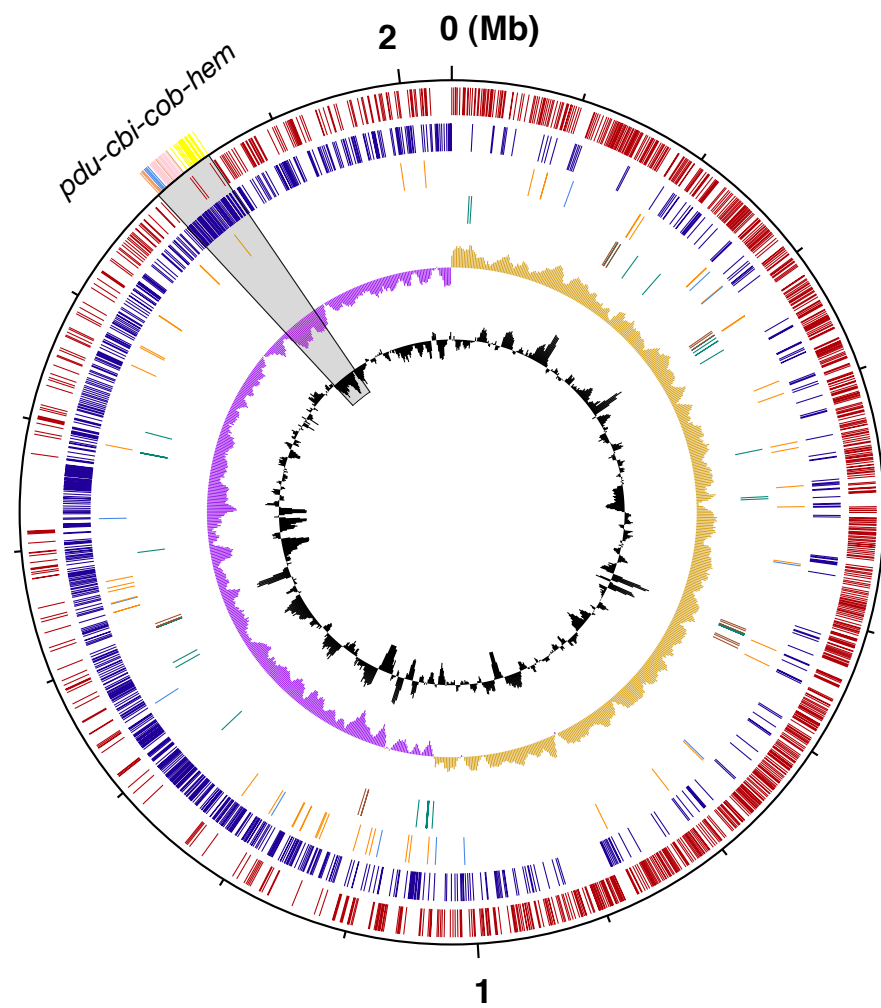

*L. fermentum* IFO 3956

2,098,685 bp

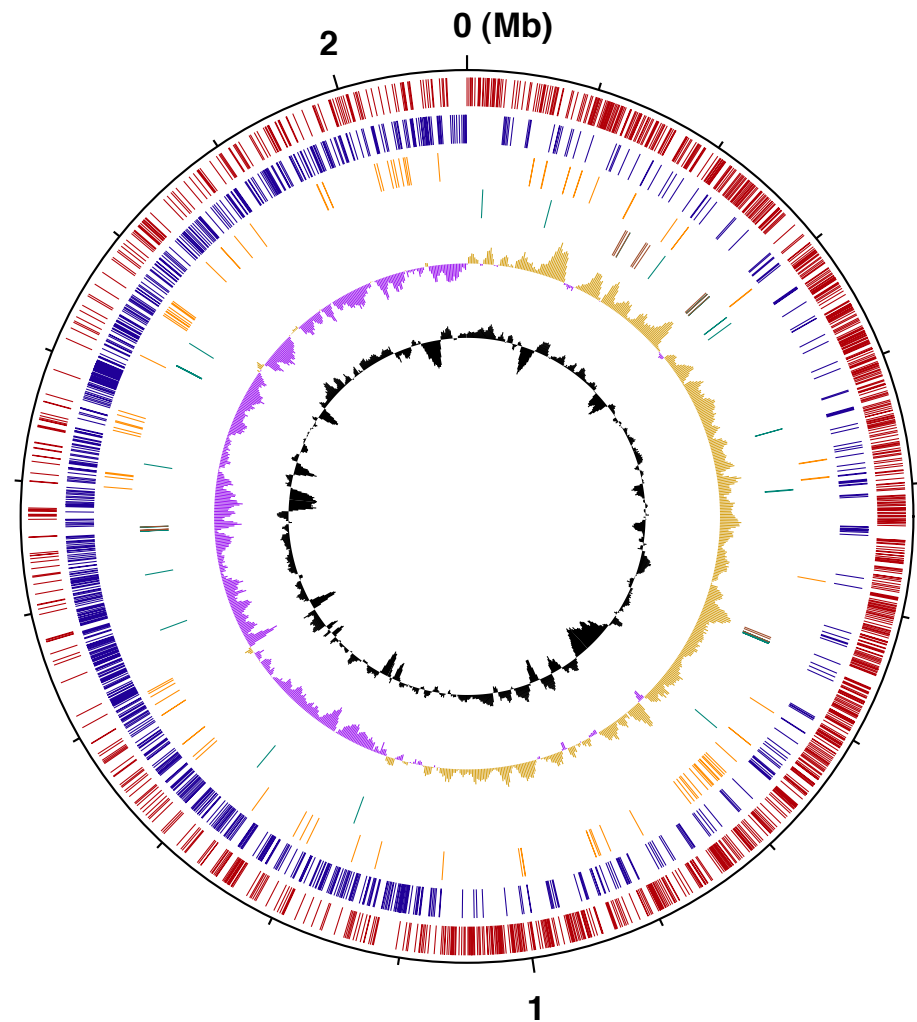

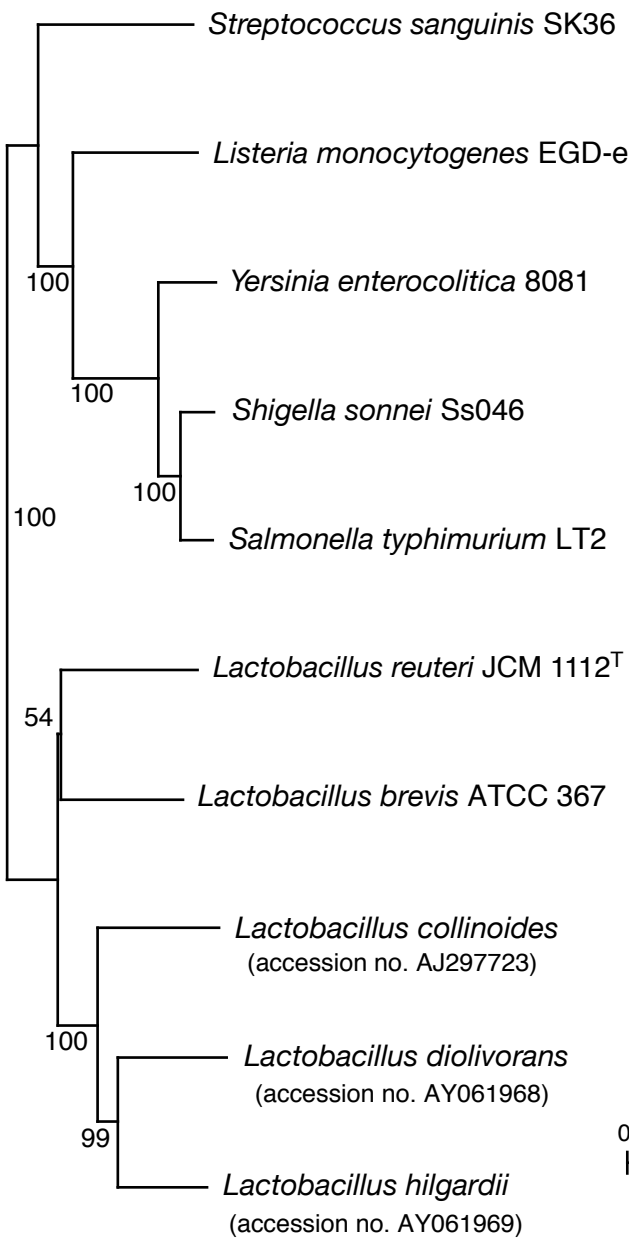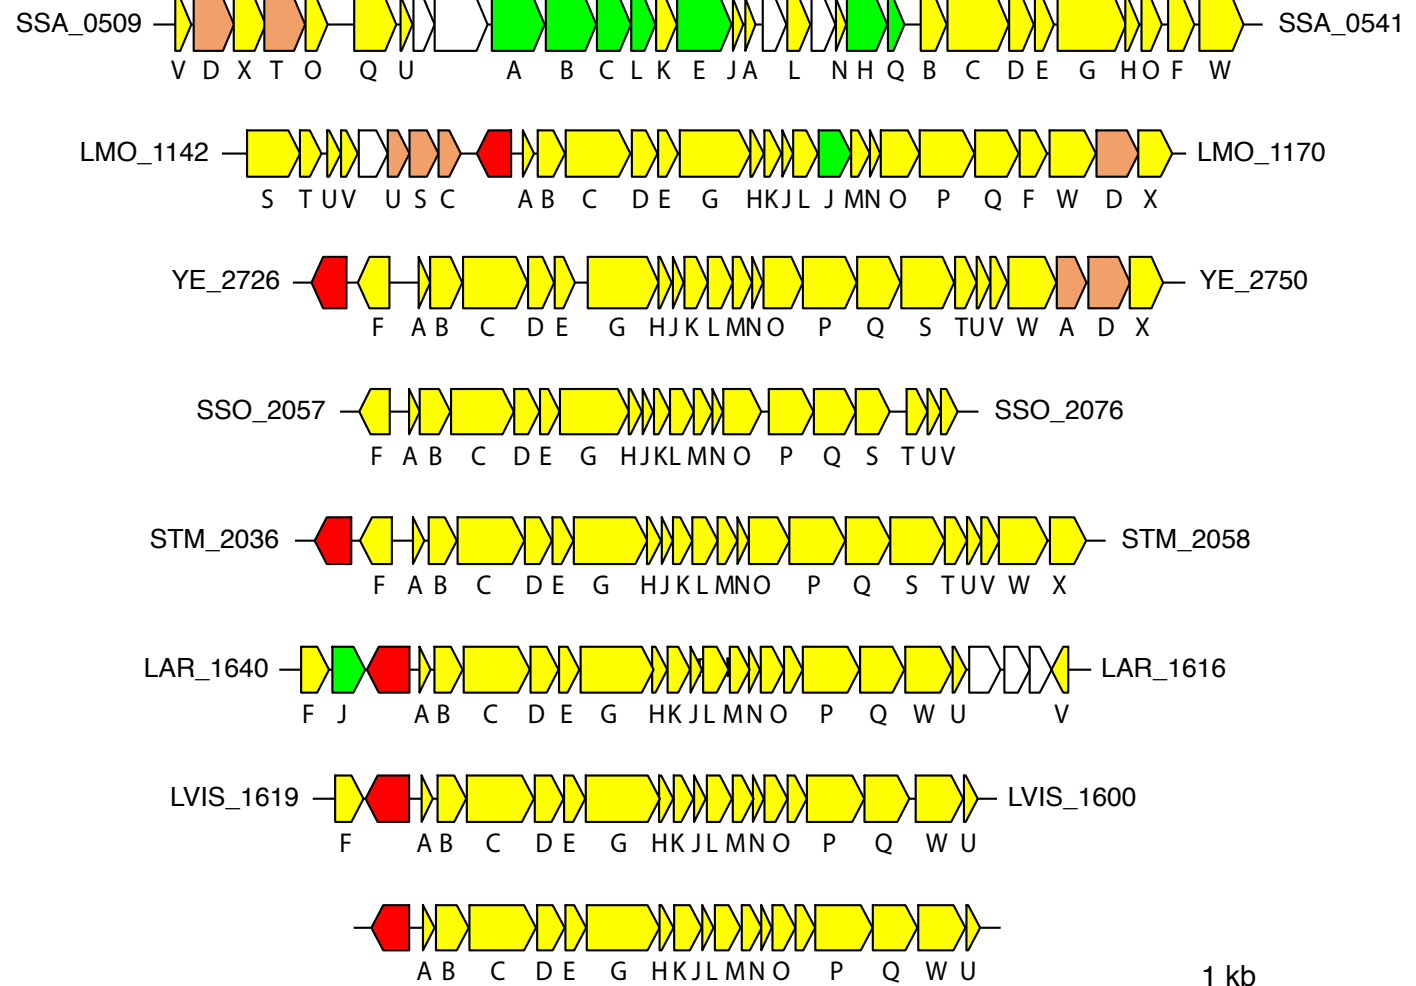

1 kb

0.02

Supplementary Figure S2



*L. reuteri* JCM 1112<sup>T</sup>

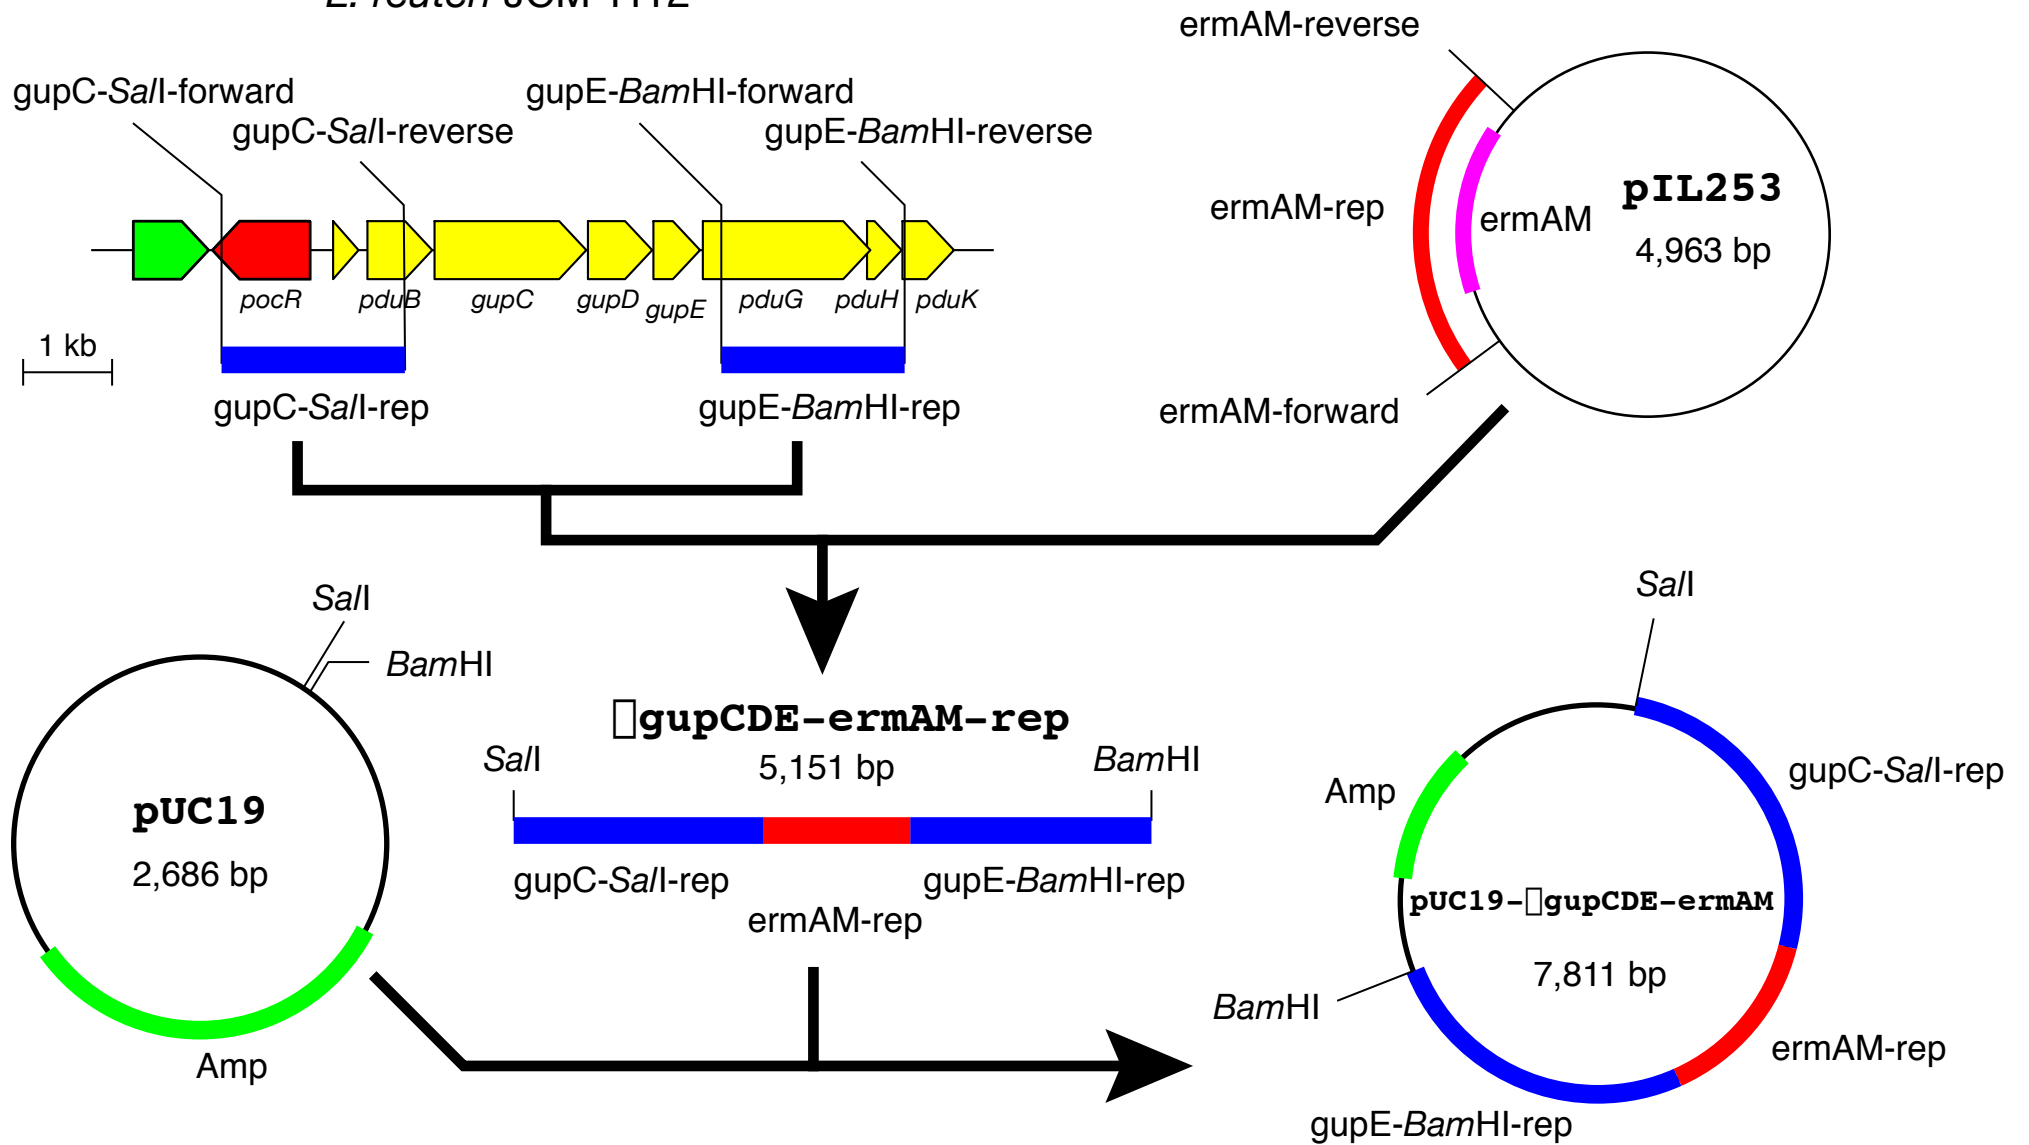

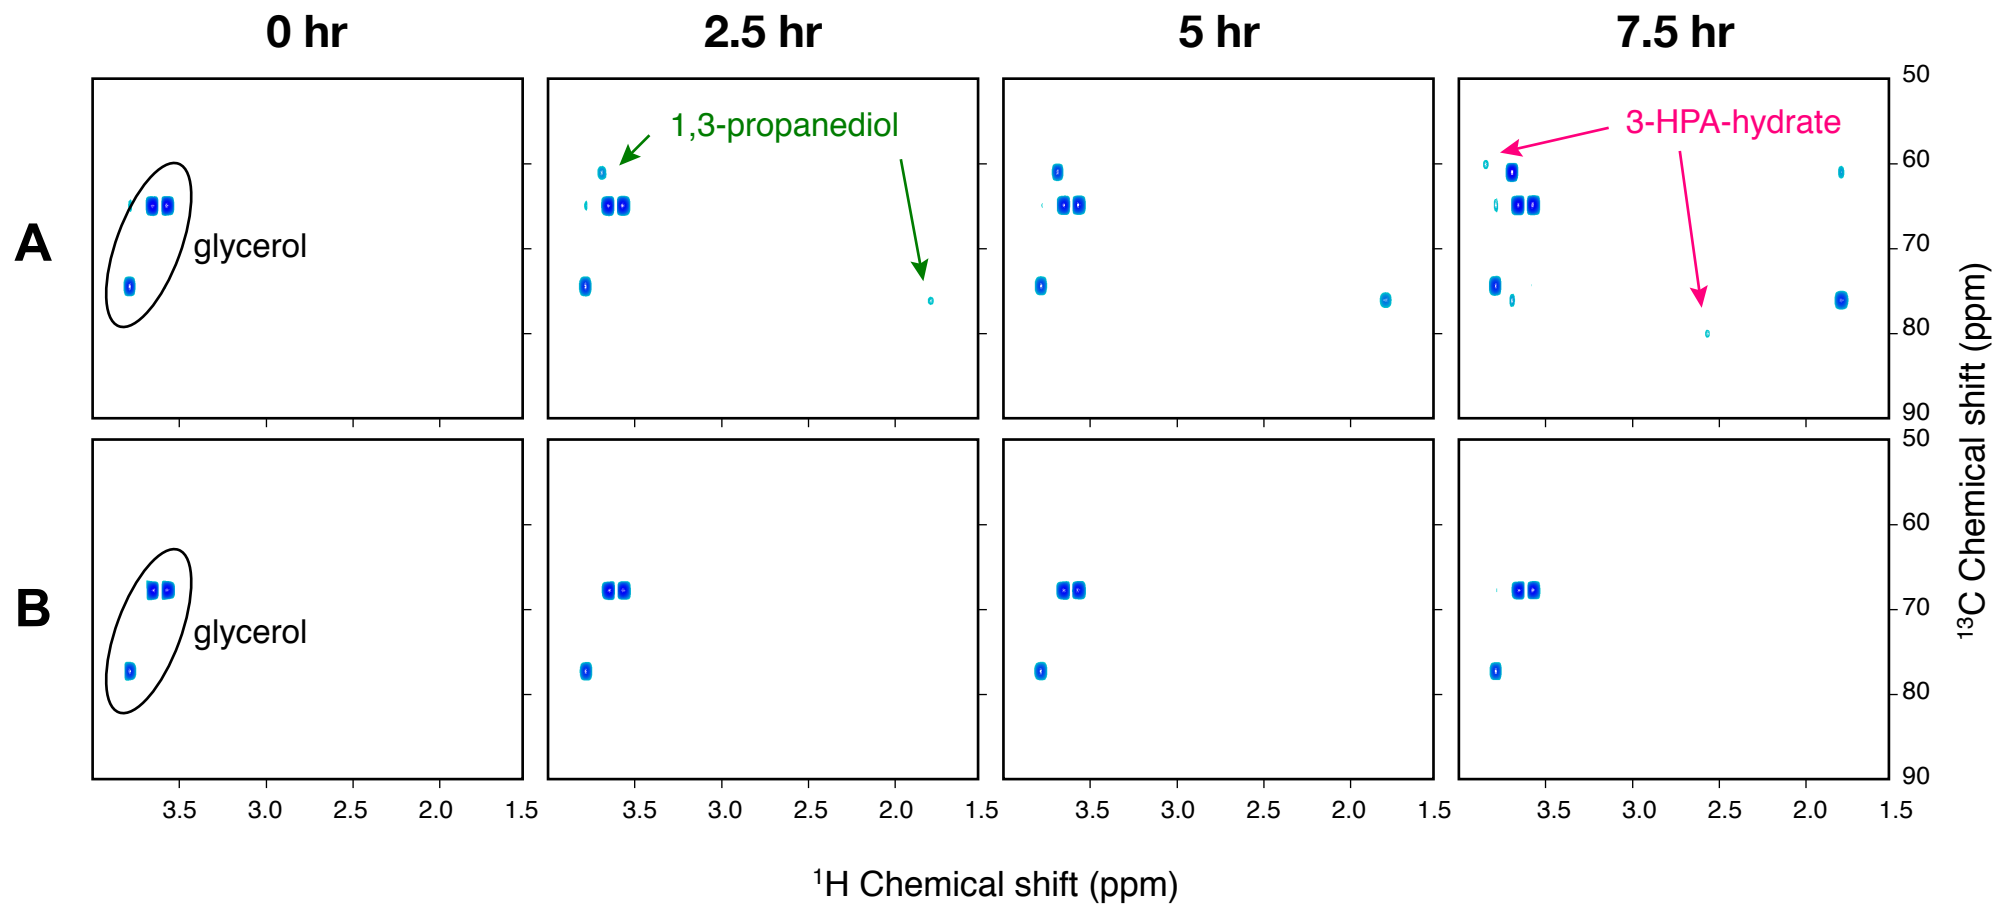

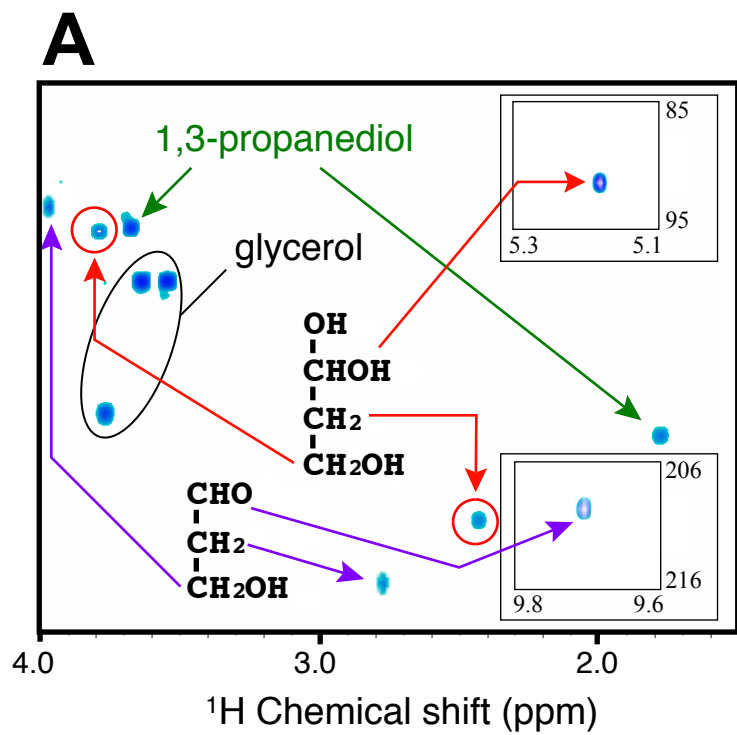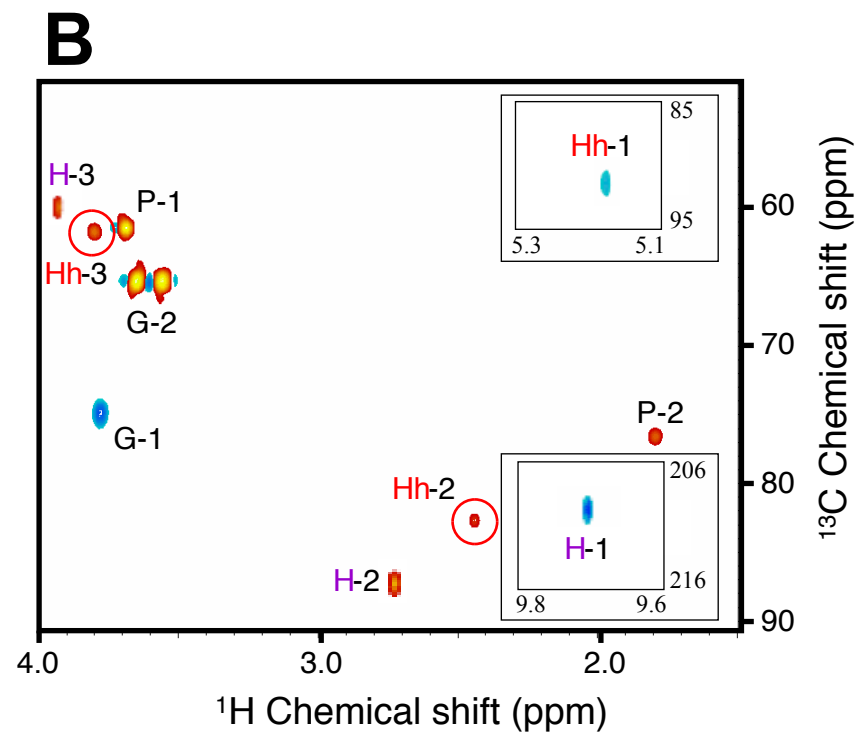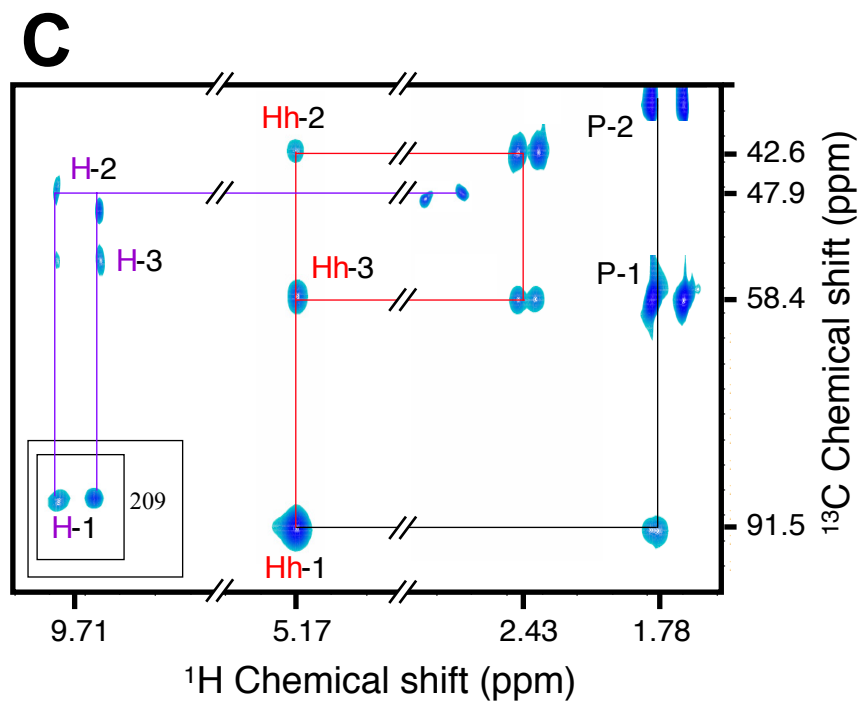

Supplementary Figure S5
